# Supplementary material for: A first-in-kind MAPK13 inhibitor that can correct stem cell reprogramming and post-injury disease
Source: PubMed Central journal article supplement — bioRxiv. 2024 Aug 22:2024.08.21.608990. Preprint. [Version 1] doi: 10.1101/2024.08.21.608990 (PMC11370402; doi:10.1101/2024.08.21.608990), 2024-08-22
Supplement: media-1.pdf [file media-1.pdf]

## **Supplemental Figures 1-10 and Tables 1-4**

### **A first-in-kind MAPK13 inhibitor that modifies post-viral lung disease**

**Yong Zhang<sup>1</sup>, Kangyun Wu<sup>1</sup>, Dailing Mao<sup>1</sup>, Courtney A. Iberg<sup>1</sup>, Huiqing Yin-Declue<sup>1</sup>, Kelly Sun<sup>1</sup>, Hallie A. Wikfors<sup>1</sup>, Shamus P. Keeler<sup>1</sup>, Ming Li<sup>1</sup>, Deanna Young<sup>1</sup>, Jennifer Yantis<sup>1</sup>, Erika C. Crouch<sup>2</sup>, Joshua R. Chartock<sup>1</sup>, Zhenfu Han<sup>1</sup>, Derek E. Byers<sup>1</sup>, Steven L. Brody<sup>1</sup>, Arthur G. Romero<sup>1</sup>, and Michael J. Holtzman<sup>1,3,4\*</sup>**

<sup>1</sup>Pulmonary and Critical Care Medicine, Department of Medicine, <sup>2</sup>Department of Pathology and Immunology, and

<sup>3</sup>Department of Cell Biology and Physiology, Washington University School of Medicine, St. Louis, MO 63110 and

<sup>4</sup>NuPeak Therapeutics Inc., St. Louis, MO 63105

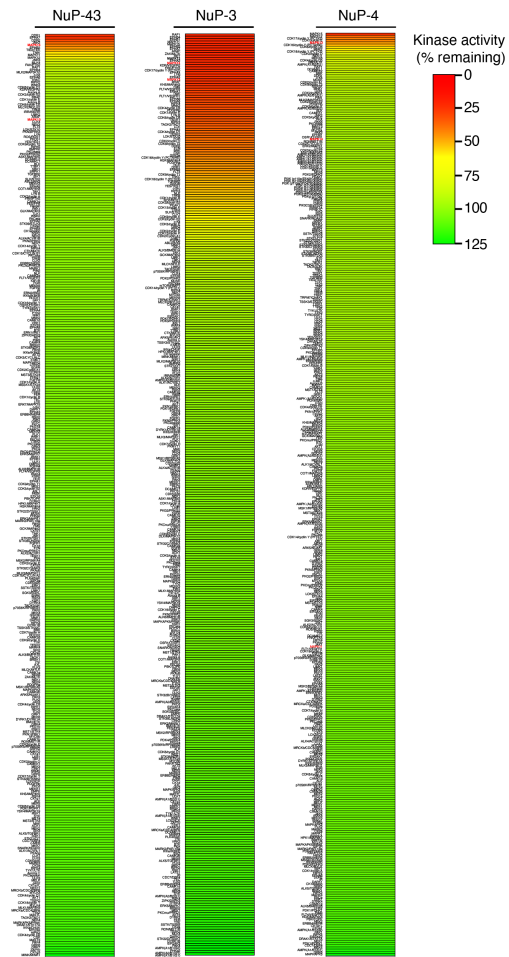

**Supplemental Fig. 1. Kinase inhibition profile supports NuP-4 selectivity for MAPK13.** Heat maps depict percentage of remaining kinase activity for NuP-43 (BIRB-796), NuP-3, and NuP-4 at 100 nM using a 425-kinase screening panel.

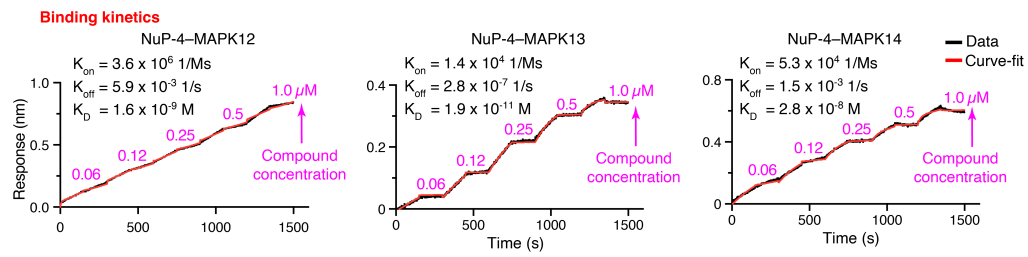

**Supplemental Fig. 2. Binding kinetics support NuP-4 selectivity for MAPK13.** Biolayer interferometry (BLI) analysis for NuP-4 binding to MAPK12, MAPK13, and MAPK14.

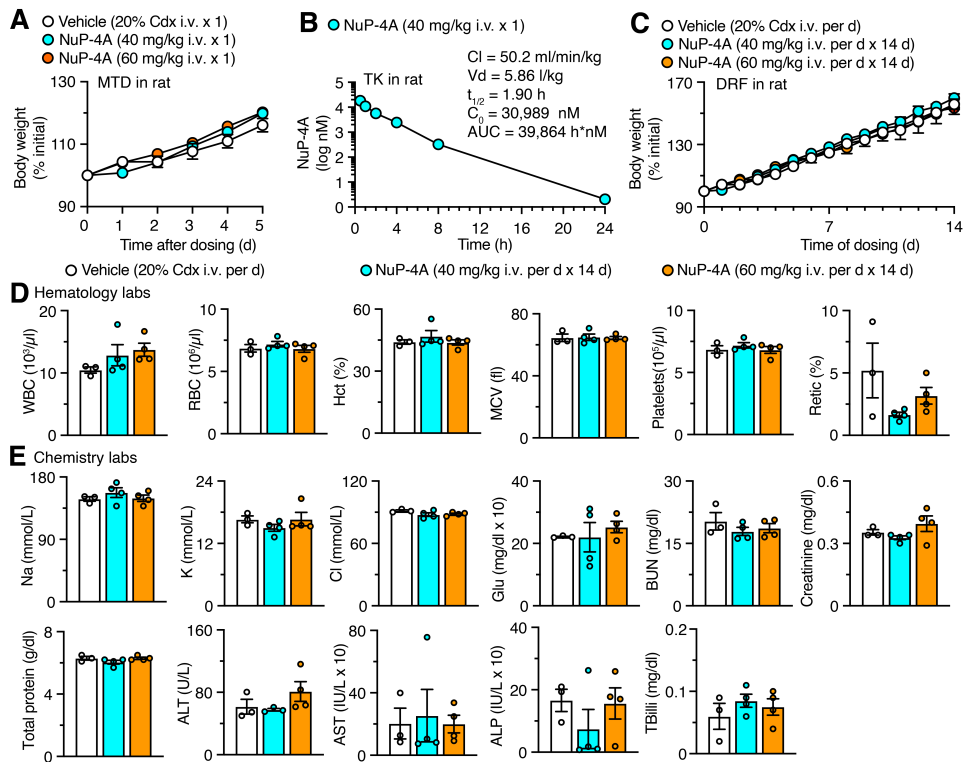

**Supplemental Fig. 3. NuP-4 demonstrates safety in rat toxicology studies.** **A**, Body weights from maximum tolerated (feasible) dose study limited to 60 mg/kg by compound solubility in excipient 2-hydroxypropyl- $\beta$ -cyclodextrin (Cdx). **B**, Toxicokinetic (TK) analysis for NuP-4A with single dose at 40 mg/kg i.v. **C**, Body weights for dose-range finding (DRF) study at 40 and 60 mg/kg i.v. each day for 14 d. **D**, Hematology lab values for conditions in (c). **E**, Chemistry lab values for conditions in (C). Values represent mean  $\pm$  s.e.m. ( $n=3-4$  rats or mice per condition). No significant differences were detected from control vehicle (Cdx) condition using ANOVA and Tukey correction.

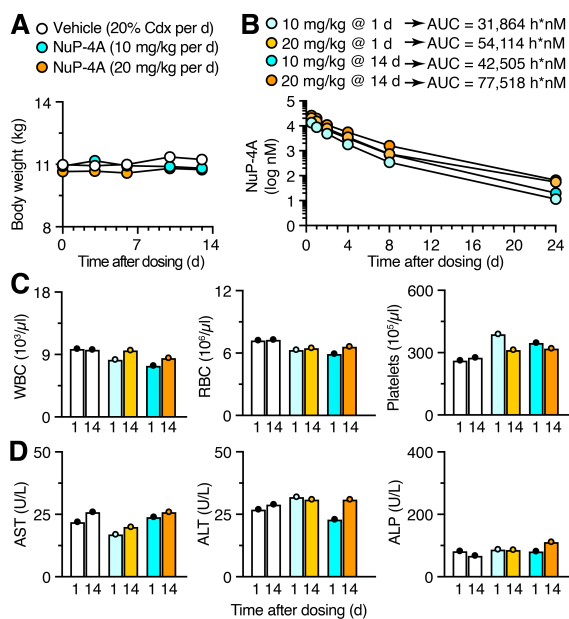

**Supplemental Fig. 4. NuP-4 demonstrates safety in dog toxicology studies.** **A**, Body weights for dose-range finding (DRF) study at 10 and 20 mg/kg i.v. each day for 14 d performed at maximum tolerated (feasible) dose study limited to 20 mg/kg by compound solubility. **B**, TK analysis for NuP-4A with single dose at 10 or 20 mg/kg i.v. at 1 and 14 d after starting the dose-range finding study. **C**, Hematology lab values for conditions in (B). **D**, Chemistry lab values for conditions in (B). Values represent mean  $\pm$  s.e.m. (n=3-4 rats or mice per condition). No significant differences were detected from control vehicle condition using ANOVA and Tukey correction.

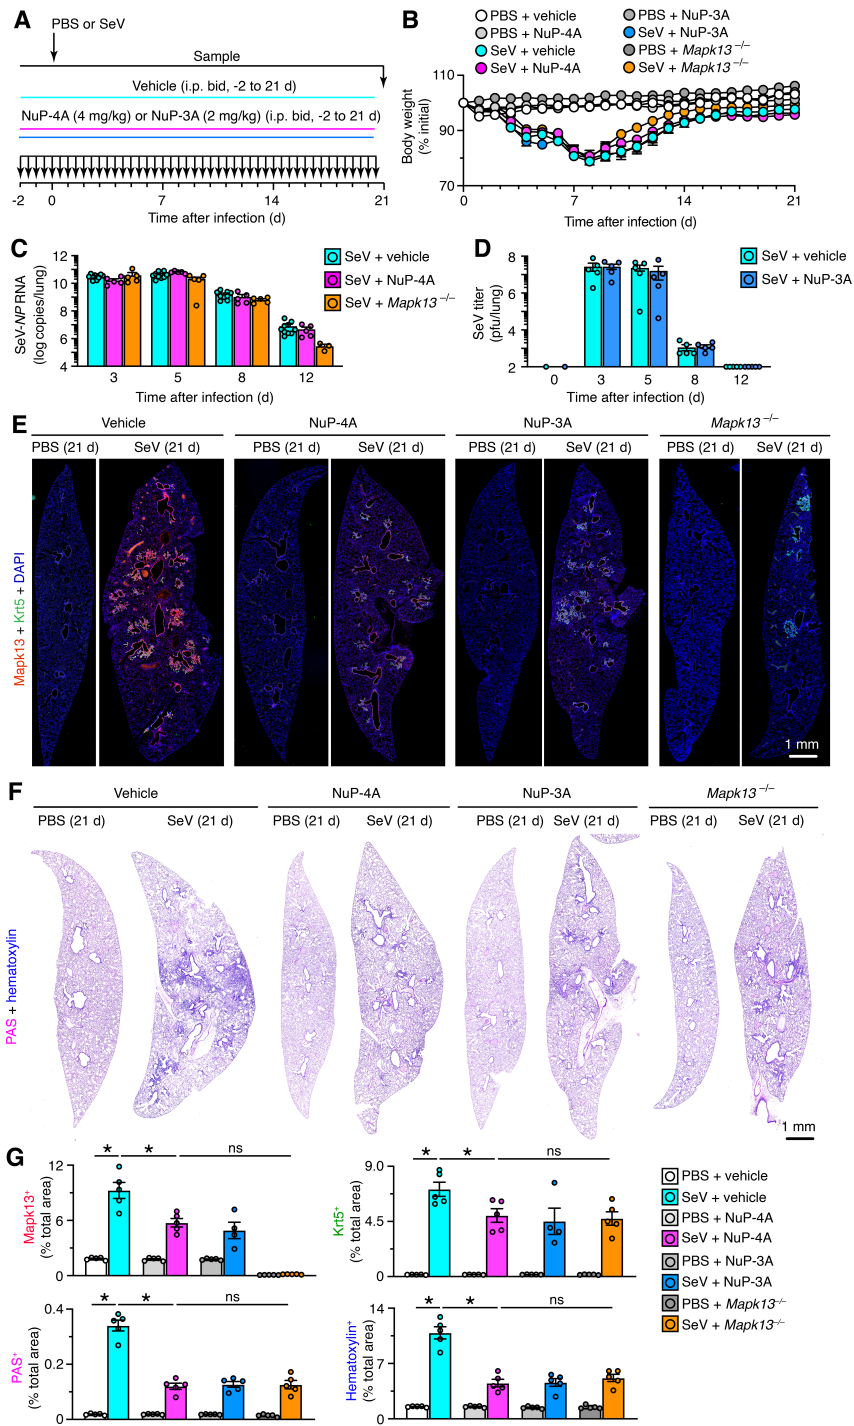

**Supplemental Fig. 5. NuP-4A is equivalent to NuP-3A or Mapk13-deficiency in blocking PVL D at 21 d after infection in the mouse model based on histology.** **A**, Protocol scheme for SeV infection and NuP-4A versus NuP-3A treatment or *Mapk13*-gene knockout and assessment during acute illness and 21 d after infection. **B**, Body weights for conditions in (A). **C**, Levels of viral RNA in lung tissue for NuP-4A treatment and *Mapk13*<sup>-/-</sup> conditions in (A). **D**, Corresponding levels of viral titer for NuP-3A treatment conditions in (A). **E**, Immunostaining for Mapk13 and Krt5 with DAPI counterstaining in lung sections for conditions in (A). **F**, PAS and hematoxylin staining of lung sections for conditions in (A). **G**, Quantitation of staining for conditions in (E,F). Data are representative of three separate experiments with n=8 animals per condition in each experiment (mean ± s.e.m.). \**P* < 0.05 using ANOVA and Tukey correction. \**P* < 0.05 using ANOVA. Abbreviation: bid, twice daily; pfu, plaque-forming unit.

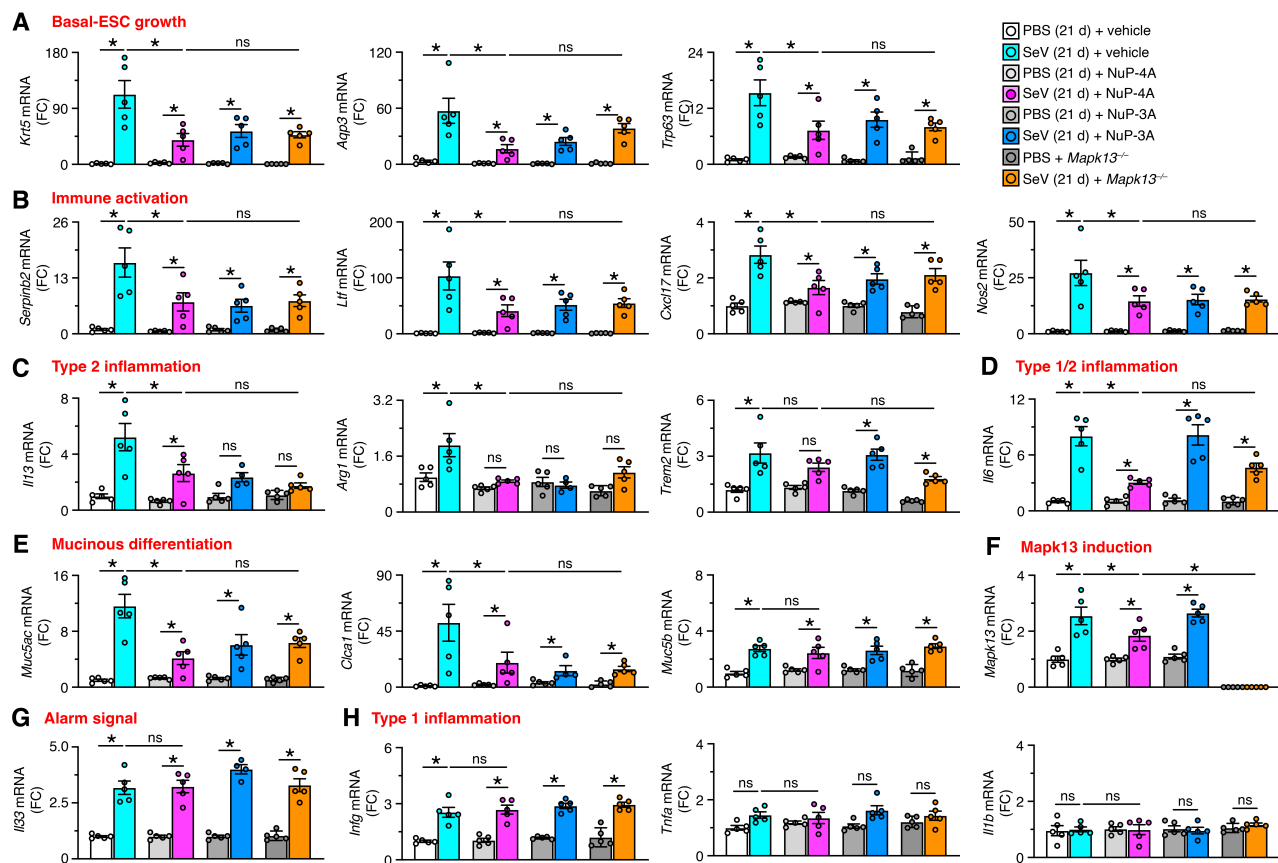

**Supplemental Fig. 6. NuP-4A is equivalent to Mapk13-deficiency in blocking PVL D at 21 d after infection in the mouse model based on biomarkers. A-H,** Lung levels of mRNA biomarkers for indicated disease endpoints for conditions in Supplemental Fig. 5A. Data are representative of three separate experiments with n=8 animals per condition in each experiment (mean  $\pm$  s.e.m.). \* $P < 0.05$  using ANOVA and Tukey. correction.

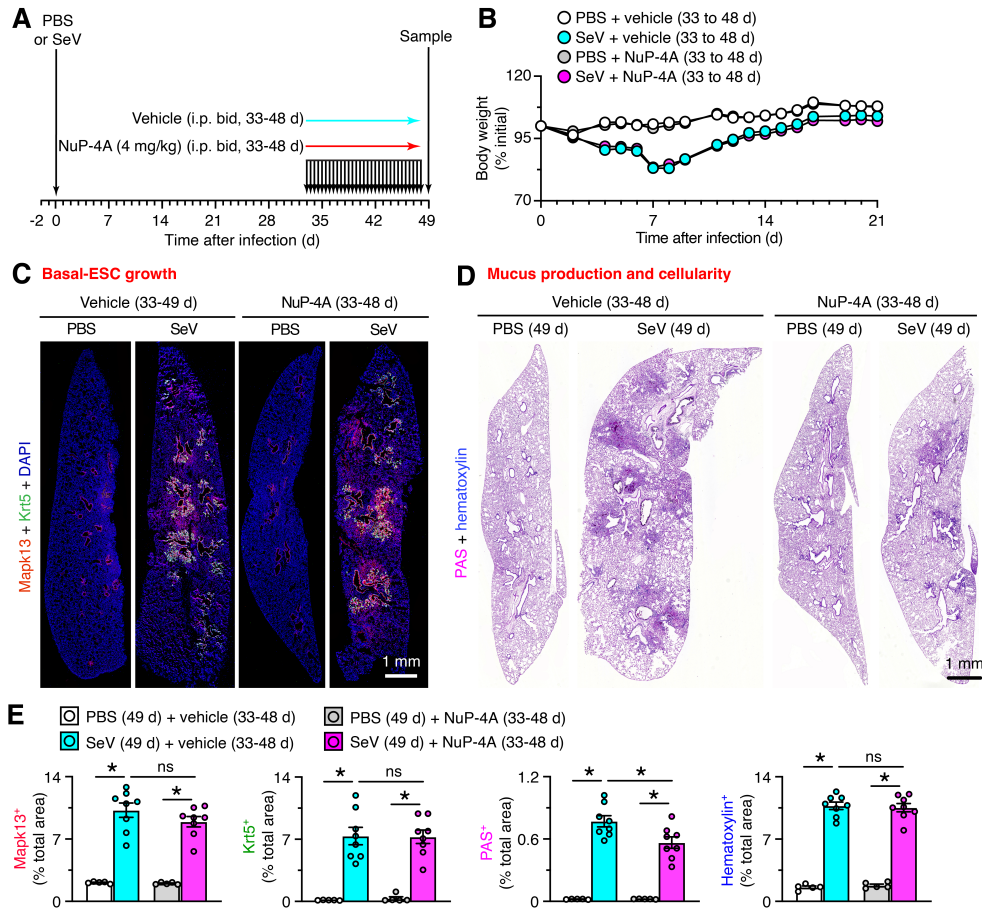

**Supplemental Figure 7. NuP-4A reverses disease in the mouse model of PVL.** **A**, Protocol scheme for SeV infection or PBS control and then vehicle or NuP-4A treatment at 33-48 d after infection with assessment at 49 d after infection. **B**, Body weights for conditions in (A). **C**, Immunostaining for Mapk13 and Krt5 with DAPI counterstaining in lung sections for conditions in (A). **D**, PAS and hematoxylin staining of lung sections for conditions in (A). **E**, Quantitation of staining for conditions in (C,D). Data are representative of two separate experiments with n=8 animals per condition in each experiment (mean  $\pm$  s.e.m.). \* $P$  < 0.05 using ANOVA and Tukey correction.



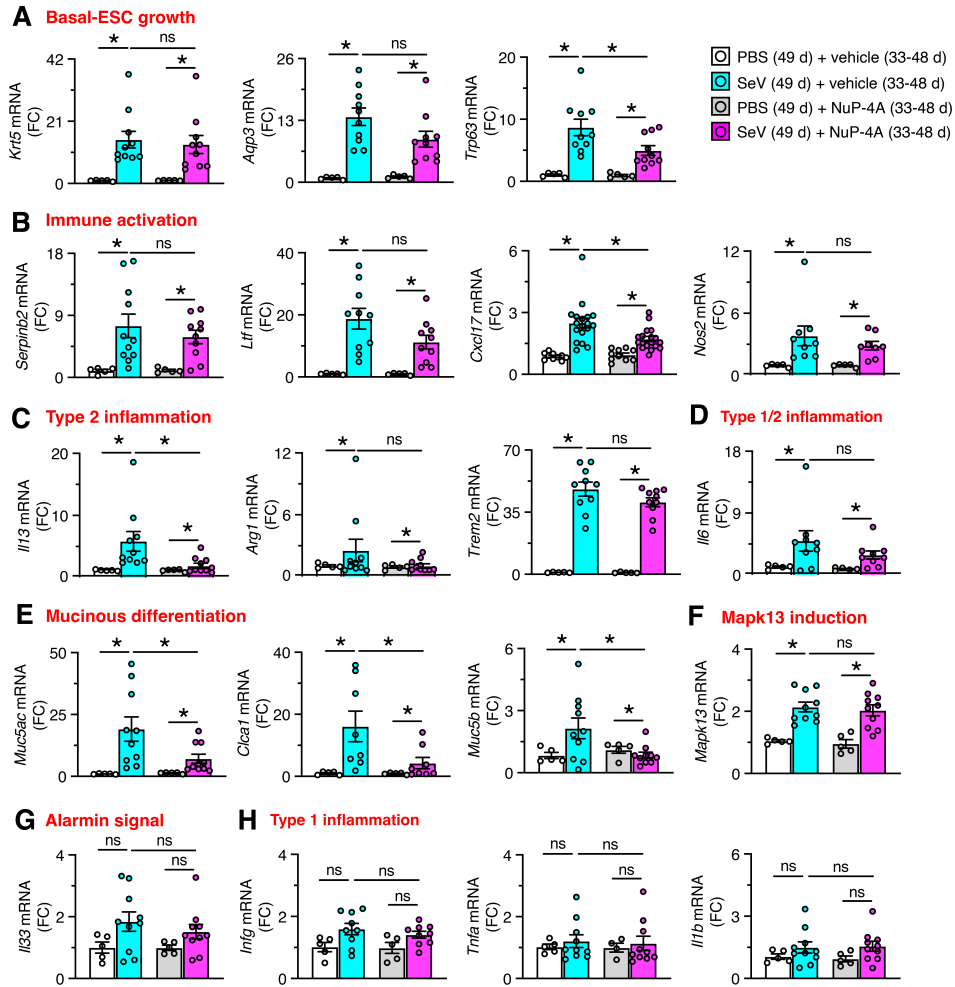

**Supplemental Figure 8. NuP-4A reverses biomarkers of type 2 inflammation and mucinous differentiation in the mouse model of PVLV. A-H,** Lung levels of mRNA biomarkers for indicated disease endpoints for conditions in Fig. 7A. Data are representative of two separate experiments with n=8-16 animals per condition in each experiment (mean  $\pm$  s.e.m.). \* $P < 0.05$  using ANOVA. \* $P < 0.05$  using ANOVA and Tukey. correction.

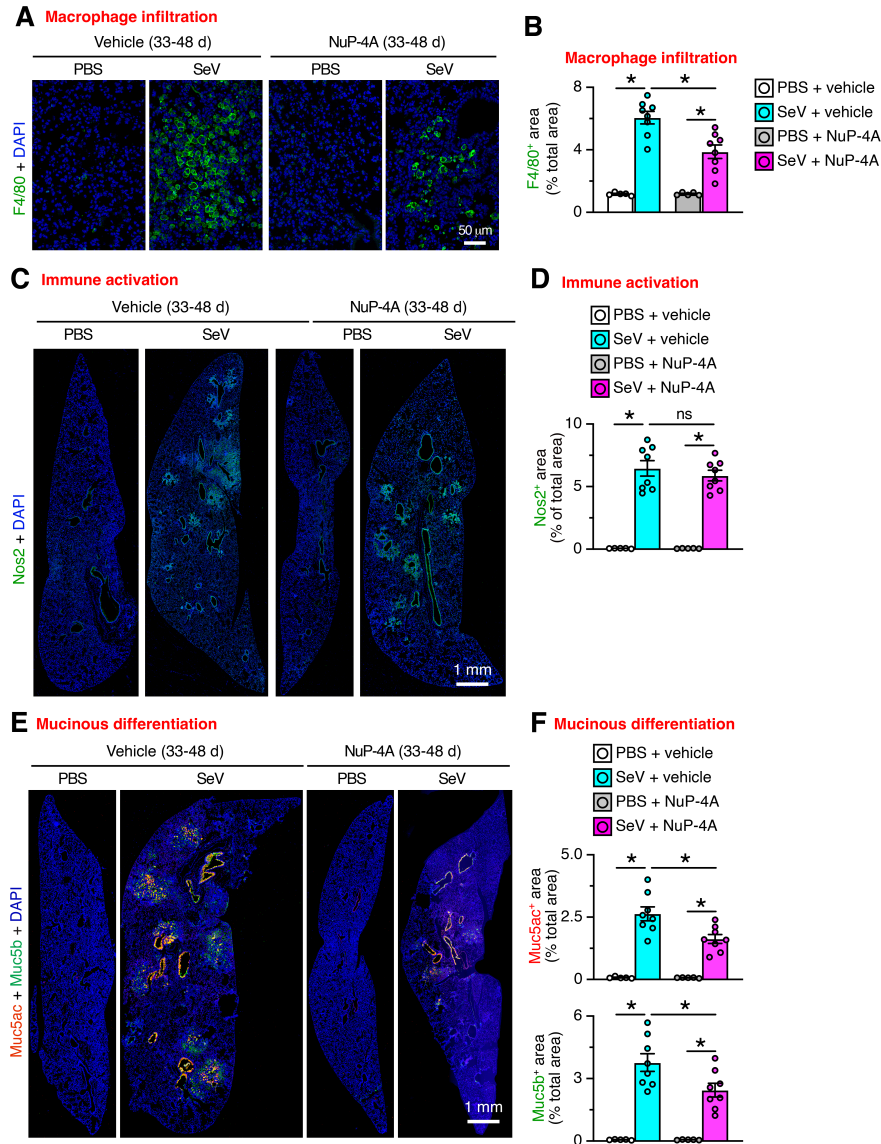

**Supplemental Figure 9. NuP-4A reverses clinical biomarkers of macrophage infiltration and mucus production in the mouse model of PVL D.** **A**, Immunostaining for F4/80 with DAPI counterstaining of lung sections for conditions in Fig. 7A. **B**, Quantitation of staining for (A). **C**, Immunostaining of lung sections for Nos2 with DAPI counterstaining for conditions in (A). **D**, Quantitation of immunostaining for (C). **E**, Immunostaining of lung sections for Muc5ac and Muc5b with DAPI counterstaining for conditions in (A). **F**, Quantitation of immunostaining for (E). Values represent mean  $\pm$  s.e.m. (n=8 mice per condition). \* $P < 0.05$  by ANOVA and Tukey correction.

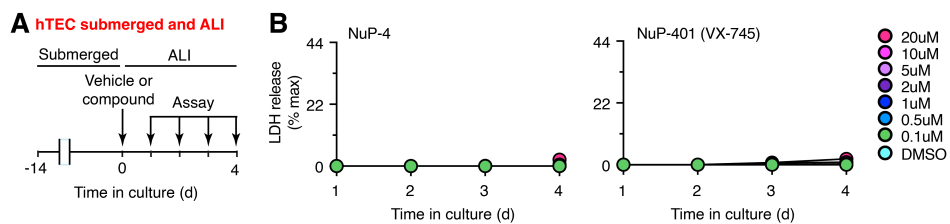

**Supplemental Fig. 10. NuP-4 is not cytotoxic in hTEC cultures.** **A**, Protocol scheme for hTEC study using submerged and ALI culture conditions to assess cell toxicity with compound or vehicle control treatment using assay for LDH release. **B**, Levels of LDH release for conditions in (A). Values represent mean  $\pm$  s.e.m. for a single subject representative of 3 subjects.

**Supplemental Table 1.** Sequences of DNA primers and probes for determining levels of SeV RNA in real-time qPCR assays.

| Target gene | Type           | Sequence                        |
|-------------|----------------|---------------------------------|
| SeV-NP      | F <sup>1</sup> | 5'-GGCGGTGGTGCAATTGAG-3'        |
|             | R              | 5'-CATGAGCTTCTGTTTCTAGGTCGAT-3' |
|             | P              | 5'-AGCTCTAGACAATGCC-3'          |

<sup>1</sup>Abbreviations: F, forward primer; R, reverse primer; P, MGB probe.

**Supplemental Table 2.** Antibodies for immunostaining mouse tissues and cells.

| <b>Target Protein</b> | <b>Antibody Type</b>           | <b>Vendor</b>  | <b>Catalogue #</b> |
|-----------------------|--------------------------------|----------------|--------------------|
| F4/80                 | Rabbit mAb                     | Cell Signaling | 70076              |
| IL-33                 | Goat mAb                       | R&D Systems    | AF3626             |
| Ki-67                 | Mouse mAb                      | BD Pharmingen  | 550609             |
| Ki-67                 | Rabbit mAb                     | Cell Signaling | 12202              |
| Krt5                  | Rabbit pAb                     | Abcam          | ab53121            |
| Mapk13                | Rabbit pAb                     | R&D Systems    | AF1519             |
| Muc5ac                | Mouse mAb (45M1), biotinylated | ThermoFisher   | MS-145-B           |
| Muc5ac                | Mouse mAb (45M1)               | ThermoFisher   | MS-145-P           |
| Muc5b                 | Rabbit pAb                     | Abcam          | ab87276            |
| Nos2                  | Rabbit pAb                     | Abcam          | Ab3523             |
| Sftpc                 | Rabbit pAb                     | Abcam          | ab90716            |

<sup>1</sup>Abbreviations: mAb, monoclonal antibody, pAb, polyclonal antibody.

**Supplemental Table 3.** Sequences of DNA primers and probes for real-time qPCR assays in mouse tissue samples.

| Target Gene     | Type                     | ID/Sequence                                                                                                       |
|-----------------|--------------------------|-------------------------------------------------------------------------------------------------------------------|
| <i>Arg1</i>     |                          | Mm00475988_m1 (ThermoFisher)                                                                                      |
| <i>Aqp3</i>     |                          | Mm.PT.58.13308206 (Integrated DNA Technologies)                                                                   |
| <i>Clca1</i>    | F <sup>1</sup><br>R<br>P | 5'-ACCGGCTGCCGCTAAAGAGCTTGAG-3'<br>5'-AGACCATTGTTCTGAACCTGATCCGAAG-3'<br>5'-AGCTGTCCAAAATGACAGGAGGCCTGCAGACATA-3' |
| <i>Cxcl17</i>   |                          | Mm.PT.58.28640067 (Integrated DNA Technologies)                                                                   |
| <i>Gapdh</i>    |                          | Mm.PT.39a.1 (Integrated DNA Technologies)                                                                         |
| <i>IFNg</i>     |                          | Mm.PT.58.41769240 (Integrated DNA Technologies)                                                                   |
| <i>Il1b</i>     |                          | Mm.PT.58.41616450 (Integrated DNA Technologies)                                                                   |
| <i>Il6</i>      |                          | Mm.PT.58.10005566 (Integrated DNA Technologies)                                                                   |
| <i>Il13</i>     | F<br>R<br>P              | 5'-GGAGCTGAGCAACATCACACA-3'<br>5'-CACACTCCATACCATGCTGCC-3'<br>5'-CCAGACTCCCCTGTGCA-3'                             |
| <i>Il33</i>     |                          | Mm00505403_m1 (ThermoFisher)                                                                                      |
| <i>Krt5</i>     |                          | Mm.PT.58.41573083 (Integrated DNA Technologies)                                                                   |
| <i>Ltf</i>      |                          | Mm00434787_m1 (ThermoFisher)                                                                                      |
| <i>Mapk13</i>   | F<br>R<br>P              | 5'-GGAGCTACCCAAGACCTACCT-3'<br>5'-TGTCCGCTTGTGCGATGGCCGA-3'<br>5'-GCGCACGTCGGCA-3'                                |
| <i>Muc5ac</i>   | F<br>R<br>P              | 5'-TACCACTCCCTGCTTCTGCAGCGTGTCA-3'<br>5'-ATAGTAACAGTGGCCATCAAGGTCTGTCT-3'<br>5'-TATACCCCTTGGGATCCATCATCTACA-3'    |
| <i>Muc5b</i>    | F<br>R<br>P              | 5'-CTTTCACCCTCAGGAACACGAT-3'<br>5'-TTCGAGGATTATACAGTTCAAAGCA-3'<br>5'-TGAAGGACAAGGTGTGGAGATT-3'                   |
| <i>Nos2</i>     |                          | Mm.PT.58.43705194 (Integrated DNA Technologies)                                                                   |
| <i>SerpinB2</i> |                          | Mm.PT.58.13584177 (Integrated DNA Technologies)                                                                   |
| <i>Tnfa</i>     |                          | Mm.PT.58.12575861 (Integrated DNA Technologies)                                                                   |
| <i>Trem2</i>    |                          | Mm.PT.58.7992121 (Integrated DNA Technologies)                                                                    |
| <i>Trp63</i>    |                          | Mm.PT.58.11081628 (Integrated DNA Technologies)                                                                   |

<sup>1</sup>Abbreviations: F, forward primer; R, reverse primer; P, MGB probe.

**Supplemental Table 4.** Sequences of DNA primers and probes for real-time qPCR assays in human cell samples.

| Target Gene   | Type | ID/Sequence                             |
|---------------|------|-----------------------------------------|
| <i>CXCL17</i> | F    | 5'-GCTGCCACTAATGCTGATGT-3'              |
|               | R    | 5'-GAGCCATCTCCTAGAAGCCT-3'              |
|               | P    | 5'-CTCTGGCGACCCCTGGATTGATCAG -3         |
| <i>GAPDH</i>  | F    | 5'-CAGCCGAGCCACATCCCTCAGACACCAT-3       |
|               | R    | 5'-CTTTACCAGAGTTAAAAGCAGCCCTGGTGACCA-3' |
|               | P    | 5'-AGGTCCGAGTCAACCGATTTGGTCGTATTG-3'    |
| <i>IL33</i>   | F    | 5'-AGACTTCTGGTTGCATGCC-3'               |
|               | R    | 5'-TCCAGGATCAGTCTTGCATTC-3'             |
|               | P    | 5'-CTGGTCTGGCAGTGGTTTTTCACAC -3'        |
| <i>MUC5AC</i> | F    | 5'-AGGCCAGCTACCGGGCCGCCAGACCAT-3'       |
|               | R    | 5'-GTCCCCGTACACGGCGCAGGTGGCCAGGCA-3     |
|               | P    | 5'-TGCAACACCTGCACCTGTGACAGCAGGAT-3      |

<sup>1</sup>Abbreviations: F, forward primer; R, reverse primer; P, MGB probe.
